# Supplementary material for: Pathpoint® ePOA: Revolutionizing Preoperative Care – A Literature Review and Clinical Evaluation of Digital Assessment Tools
Source: Preprints.org preprint supplement (doi:10.20944/preprints202407.1290.v1), 2024-07-16

# PROTECT YOUR PASSWORD

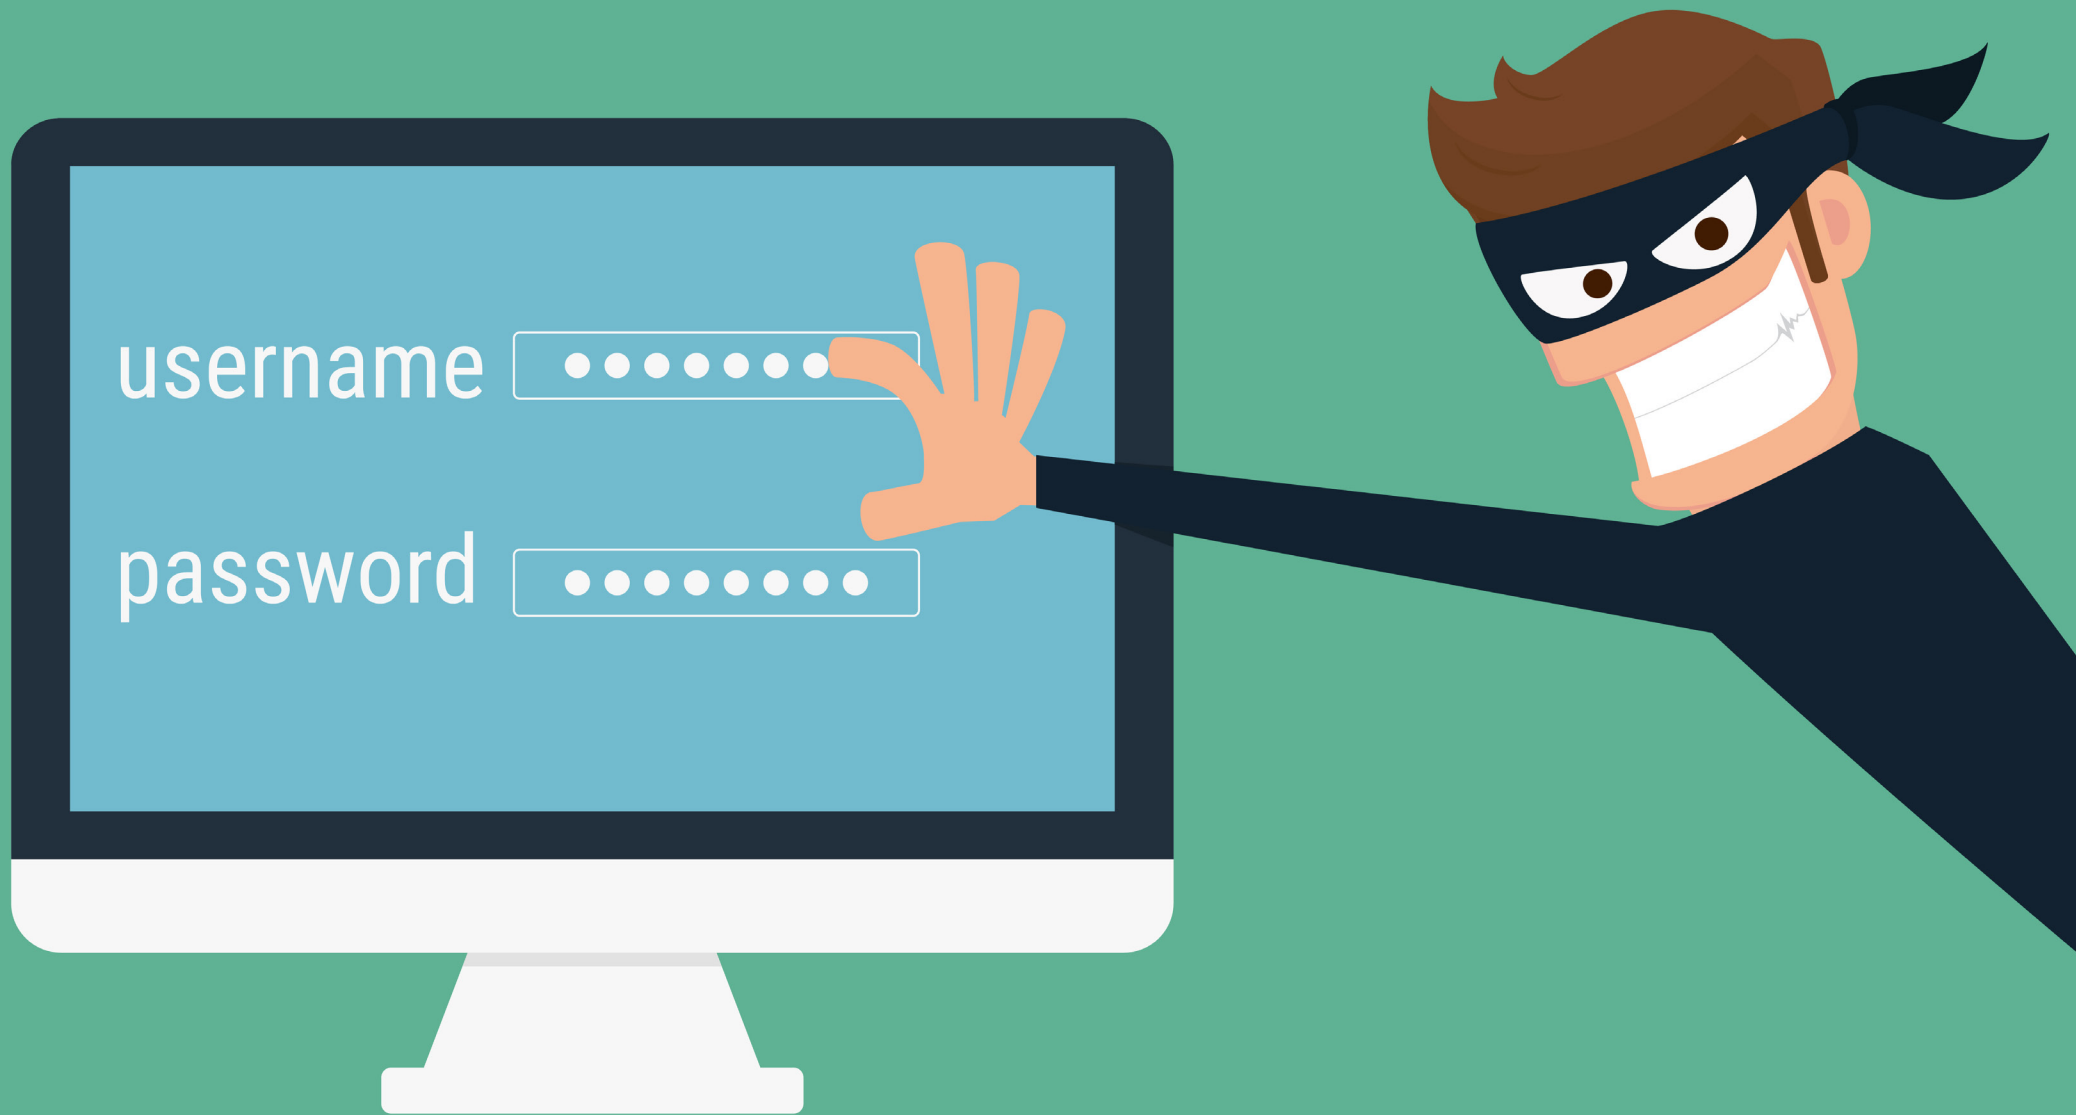

Guidance on how to create strong, foolproof passwords has changed quite a bit in recent years. As part of the **ISO/IEC 27001** certification process, it is essential that you and your staff keep up to date with advice on how to create and use bulletproof passwords.

## That was then...

Choosing a password has always been vital – yet how many companies do you know which would use something like **password1234** and never change it?

While memorable, such passwords are easy to hack. The old advice was to use complicated passwords full of random upper and lower-case letters, numbers and punctuation. This sort of thing, perhaps: **Qj7~K15t\*4**.

While these were far more difficult to hack, they were also nigh on impossible to remember without writing them down, which naturally created problems if they got into the wrong hands.

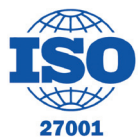

## This is now...

These days, things are far simpler – without making life easier for hackers – thanks to passphrases.

So instead of choosing a single word, pick two or three. If you can pick words which aren't in the dictionary, such as proper nouns, so much the better. For example, your three words might be **Durham**, **Samuel** and **Neptune**. The capital letters make things harder for hackers. And by all means throw in a memorable number or two. So, **Durham2Samuel7Neptune** represents a pretty secure password.

Just ensure the words aren't too familiar – so no names of pets! And tell no-one your password.

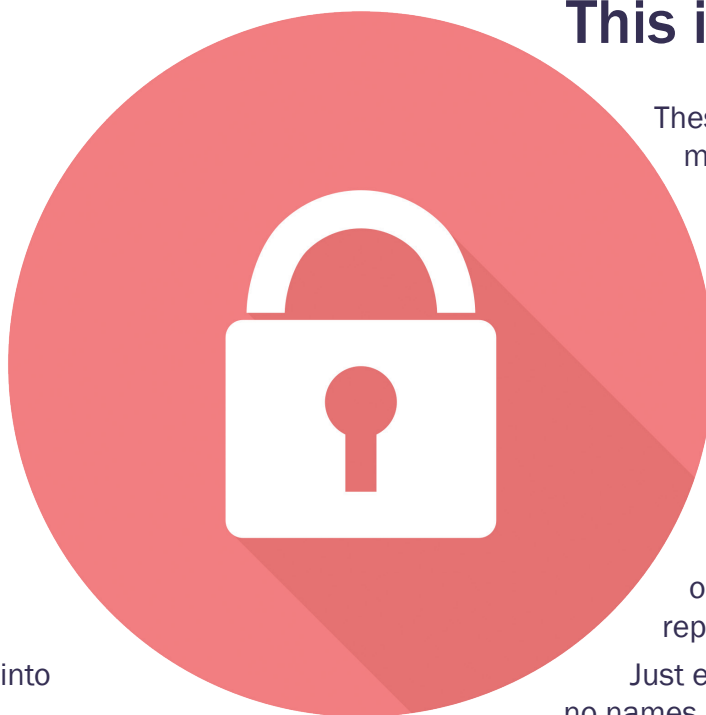

Supplement: Supplementary file 3 [file supplementary]
